# Supplementary material for: Pathogenicity and identification of host adaptation genes of the avian pathogenic Escherichia coli O145 in duck
Source: Front Cell Infect Microbiol. 2024 Nov 13;14:1453907. doi: 10.3389/fcimb.2024.1453907 (PMC11599210; doi:10.3389/fcimb.2024.1453907)
Supplement: Supplementary file 3 [file Table1.xlsx]

## Sheet: Table S1
Table S1. Primers for quantitative real-time PCR used in this study.
Gene locus tag	Target gene	Forward primer (5'-3')	Reverse primer (5'-3')	Length (bp)
OI124_00680	tktB	CGTCGATGCTGCTCTACAGT	GCCTGGCGTATAGCCAATCT	125
OI124_04745	katE	CGGCGAATTACGAACCGAAC	ATTTCCTTCCACGCGTTCCT	107
OI124_06060	gadC	TCGCGGGATGTATGTCACAG	GCGAAATGACCAGCGTTACC	95
OI124_07700	phoQ	TGATGGGCAATGTGCTGGAT	CTTGCCCAGGGCGTAAAGTA	183
OI124_08705	ompF	TTGATGGCCTGAACTTCGCT	TCTTGCAGGTTGGTACGGTC	160
OI124_15285	fdhF	TTCTACCAGGGCGTGGAAAC	CTGACCACGAACCGGGTTTA	102
OI124_15965	argC	TGACTGTTTCAGCGCAAAGC	TGATATCCGACATCGGCTGC	105
OI124_18540	hdeA	GGTCAACTCCTGGACCTGTG	TTCAGCGCTTCAGCAAAACC	84
OI124_19705	16S rDNA	GCAAGTCGAACGGTAACAGG	GGTCCCCCTCTTTGGTCTTG	151

## Sheet: Table S2
Table S2. Acquired antibiotic resistance genes detected by the ResFinderFG database.
Antibacterial drug	Resistance gene	Identity	Alignment Length/Gene Length	Position in reference	Contig	Position in contig	Phenotype	PMID	Accession number	Notes
Folate pathway antagonist	sul2	99.6333	818/816	1..816	CP109953	4457633..4458450	sulfamethoxazole	11600347	AY034138
	sul2	99.6333	818/816	1..816	CP109953	4457633..4458450	sulfamethoxazole	22888274	AJ8
Tetracycline	tet(A)	99.9216	1275/1275	1..1275	CP109953	4461411..4462685	doxycycline, tetracycline	unpublished	AF534183
Amphenicol	floR	98.1878	1214/1215	1..1214	CP109953	4463286..4464499	chloramphenicol, florfenicol	10339826	AF118107	MFS transporter
Beta-lactam	blaCTX-M-55	100	876/876	1..876	CP109953	4436383..4437258	amoxicillin, ampicillin, aztreonam, cefepime, cefotaxime, ceftazidime, ceftriaxone, piperacillin, ticarcillin	17449211, 18054206, 26169409	DQ810789	Class A; Alternative name blaCTX-M-57
Aminoglycoside	aph(3'')-Ib	100	804/804	1..804	CP109953	4458511..4459314	streptomycin	12029529	AF321551	Alternative name strA
	aph(6)-Id	100	837/837	1..837	CP109953	4459314..4460150	streptomycin	2653965	M28829	Alternative name strB
Aminoglycoside	aac(3)-IIa	100	861/861	1..861	CP109955	165737..166597	gentamicin, tobramycin	28636609	CP023555
	aadA16	99.6454	846/846	1..846	CP109955	154586..155431	spectinomycin, streptomycin	19008256	EU675686
	aph(3')-Ia	100	816/816	1..816	CP109955	163921..164736	neomycin, kanamycin, lividomycin, paromomycin, ribostamycin	6270337	V00359
Tetracycline	tet(A)	99.9167	1200/1200	1..1200	CP109955	137029..138228	doxycycline, tetracycline	12654659	AJ517790
Aminocyclitol	aadA16	99.6454	846/846	1..846	CP109955	154586..155431	spectinomycin, streptomycin	19008256	EU675686
Quinolone	OqxB	99.9683	3153/3153	1..3153	CP109955	144076..147228	chloramphenicol, benzylkonium, chloride, cetylpyridinium, chloride, nalidixic acid, ciprofloxacin, trimethoprim	18440636	EU370913
	OqxA	99.8299	1176/1176	1..1176	CP109955	142877..144052	chloramphenicol, benzylkonium, chloride, cetylpyridinium, chloride, nalidixic acid, ciprofloxacin, trimethoprim	18440636	EU370913
Folate pathway antagonist	OqxB	99.9683	3153/3153	1..3153	CP109955	144076..147228	chloramphenicol, benzylkonium, chloride, cetylpyridinium, chloride, nalidixic acid, ciprofloxacin, trimethoprim	18440636	EU370913
	dfrA27	100	474/474	1..474	CP109955	153932..154405	trimethoprim	21722254	FJ459817
	sul1	100	840/840	1..840	CP109955	155889..156728	sulfamethoxazole	unpublished	U12338
	OqxA	99.8299	1176/1176	1..1176	CP109955	142877..144052	chloramphenicol, benzylkonium, chloride, cetylpyridinium, chloride, nalidixic acid, ciprofloxacin, trimethoprim	18440636	EU370913
Rifamycin	ARR-3	100	453/453	1..453	CP109955	153347..153799	rifampicin	unpublished	JF806499	Manually predicted
Beta-lactam	blaCTX-M-64	100	876/876	1..876	CP109955	181816..182691	amoxicillin, ampicillin, aztreonam, cefepime, cefotaxime, ceftazidime, ceftriaxone, piperacillin, ticarcillin	18955524	AB284167	Class A
Macrolide	mph(A)	100	906/906	1..906	CP109955	162039..162944	erythromycin, azithromycin, spiramycin, telithromycin	8619599, 17302923	D16251	Macrolide phosphotransferase
Quaternary ammonium compound	OqxB	99.9683	3153/3153	1..3153	CP109955	144076..147228	chloramphenicol, benzylkonium, chloride, cetylpyridinium, chloride, nalidixic acid, ciprofloxacin, trimethoprim	18440636	EU370913
	qacE	100	282/333	1..282	CP109955	155548..155829	benzylkonium chloride, ethidium, bromide, chlorhexidine, cetylpyridinium chloride	8494372	X68232
	OqxA	99.8299	1176/1176	1..1176	CP109955	142877..144052	chloramphenicol, benzylkonium, chloride, cetylpyridinium, chloride, nalidixic acid, ciprofloxacin, trimethoprim	18440636	EU370913
Amphenicol	OqxB	99.9683	3153/3153	1..3153	CP109955	144076..147228	chloramphenicol, benzylkonium, chloride, cetylpyridinium, chloride, nalidixic acid, ciprofloxacin, trimethoprim	18440636	EU370913
	OqxA	99.8299	1176/1176	1..1176	CP109955	142877..144052	chloramphenicol, benzylkonium, chloride, cetylpyridinium, chloride, nalidixic acid, ciprofloxacin, trimethoprim	18440636	EU370913

## Sheet: Table S3
Table S3. Virulence genes detected by the VirulenceFinder database.
Virulence factor	Identity	Query/Template length	Contig	Position in contig	Protein function	Accession number	Role in pathogenesis
csgA	99.78	456 / 456	CP109953	1679328..1679783	Curlin major subunit CsgA	CP069646	Adhesins
fdeC	92.93	4258 / 4254	CP109953	2502284..2506528	Intimin-like adhesin FdeC	AP010953	Adhesins
fimH	100	489 / 489	CP109953	2878914..2879402	Type 1 fimbriae	NA	Adhesins
fyuA	100	2022 / 2022	CP109953	706627..708648	Siderophore receptor	CU928163	Iron acquisition systems
gad	100	1401 / 1401	CP109953	3846377..3847777	Glutamate decarboxylase	AP010953/CP004009	Acid tolerance
hha	93.33	180 / 213	CP109953	2924990..2925169	Hemolysin expression modulator Hha (previous rmoA)	000453331	Unknow functions
hlyE	99.13	918 / 918	CP109953	1567658..1568574	Avian E. coli haemolysin	ECU57430	Toxins
irp2	100	6108 / 6108	CP109953	721836..727943	High molecular weight protein 2 non-ribosomal peptide synthetase	NZ_NMNQ01000011	Iron acquisition systems
iss	99.32	294 / 294	CP109953	2000488..2000781	Increased serum survival	CP001509/CP004009	Protectins
lpfA	100	573 / 573	CP109953	3592667..3593239	Long polar fimbriae	AY646923	Adhesins
neuC	100	1179 / 1179	CP109953	633443..634621	Polysialic acid capsule biosynthesis protein	NZ_QEUG01000009	Protectins
nlpI	99.77	885 / 885	CP109953	4191330..4192214	Lipoprotein NlpI precursor	CP000243	Unknow functions
ompT	100	954 / 954	CP109953	2240910..2241863	Outer membrane protease (protein protease 7)	HE962388	Protectins
papA_F19	100	372 / 372	CP109953	4467443..4467814	Major pilin subunit F19	AP017620	Adhesins
shiA	94.46	1028 / 1044	CP109953	4492707..4493734	Homologs of the Shigella flexneri SHI-2 pathogenicity island gene shiA	AF141323/CP058222	Unknow functions
terC	99.86	714 / 714	CP109953	4659548..4660261	Tellurium ion resistance protein	CP007491	Unknow functions
terC	100	966 / 966	CP109953	4270005..4270970	Tellurium ion resistance protein	MG591698	Unknow functions
tia	100	738 / 738	CP109953	4485438..4486175	Tia Invasion determinant	CP010172	Invasins
yehA	99.9	1035 / 1035	CP109953	557062..558096	Outer membrane lipoprotein, YHD fimbriael cluster	CP042934	Systemic infections and adaptation
yehB	99.96	2481 / 2481	CP109953	554566..557046	Usher, YHD fimbriael cluster	CP042934	Systemic infections and adaptation
yehC	100	675 / 675	CP109953	553876..554550	Chaperone, YHD fimbriael cluster	CP042934	Systemic infections and adaptation
yehD	99.82	543 / 543	CP109953	553254..553796	Major pilin subunit, YHD fimbriael cluster	CP042934	Systemic infections and adaptation
terC	100	1041 / 1041	CP109955	104279..105319	Tellurium ion resistance protein	KU341381	Unknow functions
anr	95.77	213 / 213	CP109956	223671..223883	AraC negative regulator	AL391753	Unknow functions
cvaC	100	312 / 312	CP109956	24509..24820	Microcin C	X57525	Colicin V
etsC	100	1308 / 1308	CP109956	59981..61288	Putative type I secretion outer membrane protein	UGCO01000002	Heat stable enterotoxin
hlyF	100	1110 / 1110	CP109956	69268..70377	Hemolysin F	NC_023327	Toxins
iroN	100	2178 / 2178	CP109956	32256..34433	Enterobactin siderophore receptor protein	AY545598	Iron acquisition systems
iss	100	309 / 309	CP109956	44911..45219	Increased serum survival	DQ381420	Protectins
iucC	100	1743 / 1743	CP109956	80596..82338	Aerobactin synthetase	CBTO010000002	Iron acquisition systems
iutA	100	2202 / 2202	CP109956	77039..79240	Ferric aerobactin receptor	NC_007675	Iron acquisition systems
mchF	100	2097 / 2097	CP109956	24990..27086	ABC transporter protein MchF	X57524	Unknow functions
ompT	99.9	954 / 954	CP109956	67883..68836	Outer membrane protease (protein protease 7)	LT985319	Protectins
sitA	100	915 / 915	CP109956	90877..91791	Iron transport protein	ADTK01000286	Iron acquisition systems
traJ	98.4	687 / 687	CP109956	214301..214987	Protein TraJ (Positive regulator of conjugal transfer operon)	CP007150	Unknow functions
tsh	99.95	4134 / 4134	CP109956	14999..19132	Serine protease autotransporter of Enterobacteriaceae (SPATE)-Immunoglobulin A1 protease- Temperature-sensitive hemagglutinin	AY545598/EU330199	Adhesins

## Sheet: Table S4
Table S4. Results of the histopathology observations.
Organ and tissue	Pathological symptoms	Observed Time
Heart	Epicardial edema	1 day-post infection (dpi)
	Inflammatory infiltration
	Necrosis and karyopyknosis of myocardial cells
	Vasodilation
	Loose arrangement of myocardial fibers	3 dpi
Liver	Hepatocellular degeneration	1 dpi
	Inflammatory infiltration
	Hyperplasia and necrosis of hepatic capsule	2 dpi
	Hepatic sinus congestion	3 dpi
Spleen	Necrosis and karyopyknosis of parenchymal cells	2 dpi
Lung	Parabronchial and interstitial congestion	1 dpi
	Inflammatory infiltration
	Irregular structure of lung chambers and respiratory capillaries	2 dpi
	Shedding of accessory bronchial epithelial cells
	Acidophilic secretions in accessory bronchus
Kidney	Degeneration of tubular epithelial cells	1 dpi
	Irregular morphology of renal tubules	3 dpi
	Interstitial hemorrhage
	Interstitial congestion
Bursa of Fabricius	Decreased number of lymphocytes in follicles	1 dpi
	Loose structure	2 dpi
	Mucosal epithelial detachment	3 dpi
Duodenum	Necrosis and shedding of intestinal villous epithelial cells	1 dpi
	Necrotolysis of intestinal glands and mucosal layer	2 dpi
	Inflammatory infiltration
Jejunum	Necrosis and shedding of intestinal villous epithelial cells	1 dpi
	Necrotolysis of intestinal glands and mucosal layer	2 dpi
	Inflammatory infiltration
Cecum	Necrosis and shedding of intestinal villous epithelial cells	1 dpi
	Punctate necrosis of mucosal epithelial cells	2 dpi
	Vasodilation
	Necrotolysis of intestinal glands	3 dpi
	Inflammatory infiltration

## Sheet: Table S5
Table S5. Characteristics of differentially expressed genes.
Gene ID	Fold change	P value	FDR	Gene name	Function description
OI124_00680	-30.8778	9.26e-05	0.0117386	tktB	Transketolase
OI124_01680	-19.2096	0.000887243	0.0478193	nuoL	NADH:ubiquinone oxidoreductase, membrane subunit L
OI124_01840	5.73237	8.55e-06	0.0022272	glpA	Anaerobic sn-glycerol-3-phosphate dehydrogenase large FAD/NAD(P)-binding subunit
OI124_02450	-20.3241	0.000515958	0.0331415	mglB	D-galactose/methyl-galactoside ABC transporter periplasmic binding protein
OI124_02465	5.76196	0.000344526	0.0260561	preA	Putative oxidoreductase
OI124_02530	4.23089	0.000296974	0.0249291	dld	D-lactate dehydrogenase
OI124_03005	-41.1208	0.000319436	0.025387	--	Hypothetical protein
OI124_03035	-22.4871	0.0001685	0.0185767	wecB	UDP-N-acetylglucosamine 2-epimerase
OI124_03040	-19.8856	0.000801125	0.0452587	--	Glycosyltransferase family 4 protein
OI124_04320	-25.1603	3.69e-09	1.92e-06	cspC	Cold shock-like protein CspC
OI124_04460	-22.2902	0.000575545	0.0364693	yeaQ	GlsB/YeaQ/YmgE family stress response membrane protein
OI124_04665	-20.1953	0.000301801	0.0249291	astC	Succinylornithine transaminase
OI124_04670	-33.4724	0.000272732	0.0248655	astA	Arginine N-succinyltransferase
OI124_04710	-24.0433	0.000303041	0.0249291	osmE	Osmotically-inducible lipoprotein OsmE
OI124_04745	-19.3187	0.000276707	0.0248655	katE	Catalase
OI124_04815	-21.9704	4.44e-05	0.0069353	infC	Translation initiation factor IF-3
OI124_05025	-5.33108	6.29e-11	4.91e-08	lpp	Murein lipoprotein
OI124_06060	-21.2511	1.6e-06	0.000536293	gadC	L-glutamate:4-aminobutyrate antiporter
OI124_06125	-23.1974	0.000448157	0.0304552	sra	Stationary-phase-induced ribosome-associated protein
OI124_07025	5.12976	0.000504068	0.0328275	cysB	N-acetylserine-responsive cysteine regulon transcriptional activator
OI124_07100	-22.7278	0.000633434	0.039323	yciG	-
OI124_07190	3.42468	7.08e-07	0.000255499	oppA	Peptide/nickel transport system substrate-binding protein
OI124_07475	-20.1309	0.000703129	0.0417338	dadX	Alanine racemase
OI124_07480	-20.075	0.000316823	0.025387	dadA	D-amino acid dehydrogenase small subunit
OI124_07700	4.38305	0.000285628	0.0248655	phoQ	Sensor protein PhoQ
OI124_07875	-22.2411	0.000776466	0.0444006	acpP	Acyl carrier protein
OI124_08270	-18.4541	0.000382009	0.0275576	putA	Trifunctional transcriptional regulator/proline dehydrogenase
OI124_08500	-20.7804	0.000644588	0.039323	yccA	Modulator of FtsH protease
OI124_08585	-25.3777	8.51e-09	3.63e-06	rmf	Ribosome modulation factor
OI124_08705	4.51769	0.000371119	0.0271903	ompF	Porin OmpF
OI124_08835	2.3971	2.33e-06	0.00072766	pflB	Pyruvate formate-lyase
OI124_10025	-21.7496	7.4e-06	0.00204104	sucD	Succinyl-CoA synthetase beta chain with ATP-grasp domain
OI124_10030	-21.1875	1.45e-05	0.00304791	sucC	Succinyl-CoA synthetase beta subunit
OI124_10035	-20.7314	5.52e-05	0.0080818	sucB	2-oxoglutarate dehydrogenase complex dihydrolipoyllysine-residue succinyltransferase
OI124_11225	-19.8217	0.000737158	0.0432067	ybaT	Putative transporter YbaT
OI124_11455	-22.2273	0.000341399	0.0260561	hupB	DNA-binding protein HU-beta
OI124_11500	-20.2957	2.19e-05	0.00428534	cyoB	Cytochrome o ubiquinol oxidase subunit I
OI124_11515	-20.8216	0.000185581	0.019777	cyoE	Heme o synthase
OI124_11620	-22.1398	0.000259399	0.0248229	yajC	Protein translocase subunit YajC
OI124_11985	-23.3161	1.03e-05	0.00229876	yahO	DUF1471 domain-containing protein YahO
OI124_14720	-23.0928	9.67e-06	0.00229876	bsmA	Lipoprotein YjfO precursor
OI124_14895	14.8553	0.00019876	0.0207108	frdB	Fumarate reductase iron-sulfur subunit
OI124_14980	3.77489	0.000150879	0.0181402	dcuA	Anaerobic C4-dicarboxylate transporter DcuA
OI124_15285	5.69272	0.000229937	0.0229399	fdhF	Formate dehydrogenase H
OI124_15460	-3.26821	0.000352289	0.0262204	yjbJ	CsbD family protein
OI124_15745	-22.4067	0.000255962	0.0248229	hupA	Transcriptional regulator HU subunit alpha
OI124_15960	6.14602	0.00047126	0.0315677	argB	Acetylglutamate kinase
OI124_15965	9.73284	1.45e-09	9.74e-07	argC	N-acetylglutamylphosphate reductase
OI124_16175	-20.5029	0.000841813	0.0469912	tpiA	Triosephosphate isomerase
OI124_16355	-21.094	2.47e-05	0.00460897	--	AAA family ATPase
OI124_16365	-20.142	0.00075808	0.0438844	--	ImmA/IrrE family metallo-endopeptidase
OI124_17115	-20.0321	0.000205781	0.0209762	ilvC	Ketol-acid reductoisomerase
OI124_17460	5.37089	2.88e-05	0.00484496	tnaA	Tryptophanase
OI124_18285	-23.0399	0.000118689	0.0146456	cspA	RNA chaperone and antiterminator
OI124_18540	-5.13179	2.67e-09	1.56e-06	hdeA	Stress response protein HdeA
OI124_18560	-22.193	1.5e-05	0.00304791	slp	Slp family outer membrane lipoprotein
OI124_19350	-21.2377	0.000328109	0.0256417	slyD	Peptidylprolyl isomerase
OI124_19360	-21.3048	5.91e-05	0.00814548	fkpA	FKBP-type peptidyl-prolyl cis-trans isomerase
OI124_19400	5.81036	8.44e-05	0.0109908	tuf1	Translation elongation factor EF-Tu 1
OI124_19415	-23.4274	1.26e-07	4.94e-05	bfr	Bacterioferritin
OI124_19500	-21.07	0.000438273	0.0302215	rplD	50S ribosomal subunit protein L4
OI124_19520	-22.159	0.000268672	0.0248655	rplV	50S ribosomal subunit protein L22
OI124_19530	-22.2913	6.31e-05	0.00844744	rplP	50S ribosomal subunit protein L16
OI124_19580	-58.1534	3.23e-05	0.00521733	rpsE	30S ribosomal subunit protein S5
OI124_19645	-22.7568	1e-05	0.00229876	mscL	Mechanosensitive channel protein
OI124_20485	3.58305	0.000170355	0.0185767	tdcC	Threonine/serine transporter TdcC
OI124_20490	4.88012	5.87e-05	0.00814548	tdcD	Propionate kinase/acetate kinase C, anaerobic
OI124_21390	-20.6019	0.000169423	0.0185767	--	Nucleotidyltransferase
OI124_21475	-20.8545	0.000167339	0.0185767	bla	Beta-lactamase CTX-M-55
OI124_21890	5.45208	7.43e-09	3.48e-06	ansB	Periplasmic L-asparaginase II
OI124_22305	7.7432	2.29e-12	2.15e-09	xdhD	Hypoxanthine oxidase
OI124_22310	15.7659	0.000867283	0.0475107	ygfM	Oxidoreductase
OI124_22315	8.22794	0.000498738	0.0328275	ssnA	Putative proteoglycan
OI124_22320	8.83662	3.96e-34	1.86e-30	ygfK	Putative selenate reductase subunit YgfK
OI124_22350	19.8454	1.3e-14	2.03e-11	ygeY	Peptidase
OI124_22355	20.0103	1.1e-13	1.29e-10	ygeX	Diaminopropionate ammonia-lyase
OI124_22360	19.3177	5.15e-19	1.21e-15	ygeW	Diaminopropionate ammonia-lyase
OI124_22380	6.71211	5.59e-06	0.00163868	xdhA	Xanthine dehydrogenase subunit XdhA
OI124_22745	-22.2529	0.000871384	0.0475107	ygdI	ORF_f76
OI124_23480	-22.1733	5.43e-05	0.0080818	kbp	Peptidoglycan binding protein (LysM domain)
OI124_23640	-20.9258	0.000286359	0.0248655	trmD	tRNA m(1)G37 methyltransferase
OI124_23715	-27.6214	2.89e-05	0.00484496	caa	Pore-forming bacteriocin colicin S4
OI124_23730	-31.5855	0.000430411	0.0301224	--	Exc2 family lipoprotein
OI124_24510	-25.4233	0.000429614	0.0301224	dhfrV	Dihydrofolate reductase
OI124_24585	-34.4536	2.56e-05	0.00460897	aacC3	AAC(3)-II
OI124_25160	-10.9275	0.000645739	0.039323	cvaC	Colicin V
OI124_25335	-19.9925	0.000691641	0.0415783	hlyF	Hemolysin F

## Sheet: Table S6
Table S6. KEGG pathway enrichment analysis of DEGs.
KEGG_A_class	KEGG_B_class	Pathway	Number of DEG	P value	Q value	Pathway ID	Genes
Metabolism	Amino acid metabolism	Tryptophan metabolism	3	0.00152317	0.0731124	ko00380	OI124_04745;OI124_10035;OI124_17460
Metabolism	Carbohydrate metabolism	Citrate cycle (TCA cycle)	4	0.00383503	0.0920407	ko00020	OI124_10025;OI124_10030;OI124_10035;OI124_14895
Metabolism	Global and overview maps	Biosynthesis of secondary metabolites	15	0.0126078	0.153889	ko01110	OI124_00680;OI124_01840;OI124_04745;OI124_07875;OI124_08270;OI124_10025;OI124_10030;OI124_10035;OI124_11515;OI124_14895;OI124_15960;OI124_15965;OI124_16175;OI124_17115;OI124_21890
Metabolism	Carbohydrate metabolism	Propanoate metabolism	4	0.0132306	0.153889	ko00640	OI124_08835;OI124_10025;OI124_10030;OI124_20490
Metabolism	Global and overview maps	Carbon metabolism	7	0.018137	0.153889	ko01200	OI124_00680;OI124_04745;OI124_10025;OI124_10030;OI124_10035;OI124_14895;OI124_16175
Metabolism	Energy metabolism	Oxidative phosphorylation	4	0.0202208	0.153889	ko00190	OI124_01680;OI124_11500;OI124_11515;OI124_14895
Metabolism	Amino acid metabolism	Arginine and proline metabolism	3	0.02252	0.153889	ko00330	OI124_04665;OI124_04670;OI124_08270
Metabolism	Global and overview maps	2-Oxocarboxylic acid metabolism	3	0.0276721	0.153889	ko01210	OI124_15960;OI124_15965;OI124_17115
Metabolism	Carbohydrate metabolism	C5-Branched dibasic acid metabolism	2	0.0288541	0.153889	ko00660	OI124_10025;OI124_10030
Metabolism	Energy metabolism	Carbon fixation pathways in prokaryotes	3	0.0465774	0.19673	ko00720	OI124_10025;OI124_10030;OI124_14895
Genetic Information Processing	Translation	Ribosome	4	0.0477005	0.19673	ko03010	OI124_19500;OI124_19520;OI124_19530;OI124_19580
Metabolism	Metabolism of terpenoids and polyketides	Biosynthesis of ansamycins	1	0.0491825	0.19673	ko01051	OI124_00680
Metabolism	Global and overview maps	Metabolic pathways	28	0.0690809	0.233218	ko01100	OI124_00680;OI124_01680;OI124_02465;OI124_02530;OI124_03035;OI124_04665;OI124_04670;OI124_04745;OI124_07475;OI124_07480;OI124_07875;OI124_08270;OI124_08835;OI124_10025;OI124_10030;OI124_10035;OI124_11500;OI124_11515;OI124_14895;OI124_15960;OI124_15965;OI124_16175;OI124_17115;OI124_17460;OI124_20490;OI124_21890;OI124_22380;OI124_24510
Metabolism	Energy metabolism	Carbon fixation in photosynthetic organisms	2	0.0719529	0.233218	ko00710	OI124_00680;OI124_16175
Metabolism	Carbohydrate metabolism	Inositol phosphate metabolism	1	0.0728807	0.233218	ko00562	OI124_16175
Metabolism	Amino acid metabolism	Arginine biosynthesis	2	0.0791801	0.23754	ko00220	OI124_15960;OI124_15965
Metabolism	Metabolism of other amino acids	D-Alanine metabolism	1	0.0960023	0.256006	ko00473	OI124_07475
Metabolism	Biosynthesis of other secondary metabolites	Biosynthesis of various antibiotics	1	0.0960023	0.256006	ko00998	OI124_07875
Metabolism	Metabolism of cofactors and vitamins	Pantothenate and CoA biosynthesis	2	0.118311	0.283946	ko00770	OI124_02465;OI124_17115
Metabolism	Metabolism of cofactors and vitamins	Porphyrin metabolism	2	0.118311	0.283946	ko00860	OI124_11515;OI124_19415
Metabolism	Carbohydrate metabolism	Pyruvate metabolism	3	0.142611	0.325968	ko00620	OI124_02530;OI124_08835;OI124_14895
Metabolism	Metabolism of other amino acids	Cyanoamino acid metabolism	1	0.162043	0.353548	ko00460	OI124_21890
Metabolism	Global and overview maps	Biosynthesis of amino acids	5	0.173656	0.355943	ko01230	OI124_00680;OI124_15960;OI124_15965;OI124_16175;OI124_17115
Organismal Systems	Environmental adaptation	Plant-pathogen interaction	1	0.182992	0.355943	ko04626	OI124_19400
Cellular Processes	Cellular community - prokaryotes	Quorum sensing	3	0.185387	0.355943	ko02024	OI124_06060;OI124_07190;OI124_11620
Metabolism	Amino acid metabolism	Alanine, aspartate and glutamate metabolism	2	0.197344	0.364327	ko00250	OI124_08270;OI124_21890
Metabolism	Global and overview maps	Microbial metabolism in diverse environments	9	0.251516	0.433895	ko01120	OI124_00680;OI124_02530;OI124_08835;OI124_10025;OI124_10030;OI124_10035;OI124_14895;OI124_16175;OI124_22380
Metabolism	Carbohydrate metabolism	Butanoate metabolism	2	0.253105	0.433895	ko00650	OI124_08835;OI124_14895
Metabolism	Metabolism of other amino acids	beta-Alanine metabolism	1	0.298365	0.493846	ko00410	OI124_02465
Metabolism	Metabolism of cofactors and vitamins	One carbon pool by folate	1	0.333166	0.533065	ko00670	OI124_24510
Metabolism	Amino acid metabolism	Valine, leucine and isoleucine biosynthesis	1	0.349928	0.541824	ko00290	OI124_17115
Genetic Information Processing	Folding, sorting and degradation	Protein export	1	0.36628	0.54942	ko03060	OI124_11620
Metabolism	Amino acid metabolism	Lysine degradation	1	0.397788	0.578601	ko00310	OI124_10035
Cellular Processes	Cell motility	Bacterial chemotaxis	1	0.412963	0.583007	ko02030	OI124_02450
Metabolism	Lipid metabolism	Glycerophospholipid metabolism	1	0.521655	0.689176	ko00564	OI124_01840
Metabolism	Metabolism of cofactors and vitamins	Folate biosynthesis	1	0.521655	0.689176	ko00790	OI124_24510
Metabolism	Amino acid metabolism	Phenylalanine metabolism	1	0.533777	0.689176	ko00360	OI124_07480
Metabolism	Carbohydrate metabolism	Pentose phosphate pathway	1	0.545598	0.689176	ko00030	OI124_00680
Cellular Processes	Cellular community - prokaryotes	Biofilm formation - Vibrio cholerae	1	0.620539	0.76374	ko05111	OI124_03035
Environmental Information Processing	Signal transduction	Two-component system	4	0.639958	0.767949	ko02020	OI124_03035;OI124_07700;OI124_08705;OI124_14895
Metabolism	Carbohydrate metabolism	Glyoxylate and dicarboxylate metabolism	1	0.657796	0.768014	ko00630	OI124_04745
Metabolism	Carbohydrate metabolism	Glycolysis / Gluconeogenesis	1	0.683372	0.768014	ko00010	OI124_16175
Metabolism	Carbohydrate metabolism	Fructose and mannose metabolism	1	0.699377	0.768014	ko00051	OI124_16175
Environmental Information Processing	Membrane transport	Bacterial secretion system	1	0.714591	0.768014	ko03070	OI124_11620
Metabolism	Carbohydrate metabolism	Amino sugar and nucleotide sugar metabolism	1	0.721914	0.768014	ko00520	OI124_03035
Metabolism	Nucleotide metabolism	Pyrimidine metabolism	1	0.736014	0.768014	ko00240	OI124_02465
Metabolism	Nucleotide metabolism	Purine metabolism	1	0.870082	0.888594	ko00230	OI124_22380
Environmental Information Processing	Membrane transport	ABC transporters	2	0.961891	0.961891	ko02010	OI124_02450;OI124_07190

## Sheet: Table S7
Table S7. Characteristics of significantly differentially expressed sRNAs.
sRNA ID	Fold change	P value	FDR	sRNA map ID	Family name	Family accession
CP109953_predRNA103	-21.1778	7.44e-26	6.69e-25	-	-	-
CP109953_predRNA111	-20.2019	1.15e-13	4.88e-13	-	-	-
CP109953_predRNA121	-2.51446	8.62e-19	5.64e-18	-	-	-
CP109953_predRNA123	-20.0297	1.15e-10	3.68e-10	-	-	-
CP109953_predRNA126	-19.9933	2.78e-16	1.54e-15	-	-	-
CP109953_predRNA135	-21.5222	4.6e-30	4.42e-29	-	-	-
CP109953_predRNA138	-18.0006	0.00179244	0.00218738	-	-	-
CP109953_predRNA140	-18.7838	0.000140115	0.000216952	-	-	-
CP109953_predRNA141	-19.0964	1.31e-06	2.91e-06	-	-	-
CP109953_predRNA146	-18.5157	1.46e-05	2.66e-05	-	-	-
CP109953_predRNA147	-2.32933	6.54e-12	2.35e-11	sRNAG0005	-	-
CP109953_predRNA149	-19.3451	2.63e-06	5.67e-06	-	-	-
CP109953_predRNA150	-17.7323	0.00282053	0.00338464	-	-	-
CP109953_predRNA151	-20.9896	2.09e-22	1.58e-21	-	-	-
CP109953_predRNA161	-18.3473	0.000401485	0.000578139	-	-	-
CP109953_predRNA164	-18.4702	0.000338044	0.000496718	-	-	-
CP109953_predRNA167	-20.1565	3.15e-13	1.26e-12	-	-	-
CP109953_predRNA172	-20.7086	4.71e-19	3.23e-18	-	-	-
CP109953_predRNA176	-19.8164	9.13e-14	3.98e-13	-	-	-
CP109953_predRNA18	-18.114	0.000501613	0.000687926	-	-	-
CP109953_predRNA180	-18.8241	1.46e-05	2.66e-05	sRNAG0063	sroC	RF00369
CP109953_predRNA187	-19.6153	3.05e-09	8.79e-09	sRNAPU0042	-	-
CP109953_predRNA189	-21.4848	1.11e-25	9.4e-25	-	-	-
CP109953_predRNA195	-18.9541	2.28e-05	3.95e-05	-	-	-
CP109953_predRNA200	-17.9621	0.00143394	0.00176485	-	-	-
CP109953_predRNA202	-18.2112	0.000509463	0.000692101	-	-	-
CP109953_predRNA212	-19.9534	1.6e-09	4.71e-09	-	-	-
CP109953_predRNA221	25.8033	8.61e-129	1.55e-127	sRNAPU0253	-	-
CP109953_predRNA228	-20.4622	1.36e-14	6.3e-14	-	-	-
CP109953_predRNA23	-18.6717	7.73e-05	0.000123722	-	-	-
CP109953_predRNA242	-4.53244	1.33e-81	1.74e-80	-	-	-
CP109953_predRNA244	-2.02602	5.74e-18	3.44e-17	-	naRNA4	RF02564
CP109953_predRNA245	-18.5908	4.11e-05	6.88e-05	-	-	-
CP109953_predRNA246	-17.4813	0.00510223	0.00587163	-	-	-
CP109953_predRNA248	-22.6364	4.89e-54	5.87e-53	-	-	-
CP109953_predRNA251	-17.6573	0.00539658	0.00611896	-	-	-
CP109953_predRNA253	-19.5521	2.6e-08	6.81e-08	-	-	-
CP109953_predRNA254	-19.0355	3.72e-06	7.77e-06	-	-	-
CP109953_predRNA256	-18.4657	0.000486004	0.000679461	-	-	-
CP109953_predRNA260	-22.2752	6.94e-52	7.69e-51	-	-	-
CP109953_predRNA264	-19.4693	7.56e-08	1.88e-07	-	-	-
CP109953_predRNA266	-23.0688	2.83e-84	4.08e-83	-	-	-
CP109953_predRNA275	16.1991	0	0	sRNAPU0253	-	-
CP109953_predRNA280	-20.8385	3.23e-21	2.33e-20	-	-	-
CP109953_predRNA281	-18.9993	9.38e-06	1.78e-05	-	-	-
CP109953_predRNA283	-19.5134	6.62e-09	1.86e-08	-	-	-
CP109953_predRNA284	-2.35946	1.68e-22	1.35e-21	-	-	-
CP109953_predRNA293	25.7324	5.39e-111	8.62e-110	sRNAPU0253	-	-
CP109953_predRNA298	-18.2158	0.000830936	0.00108777	-	-	-
CP109953_predRNA299	-19.3792	4.57e-07	1.06e-06	-	-	-
CP109953_predRNA3	16.505	1.02438886371779e-309	4.92e-308	sRNAPU0253	-	-
CP109953_predRNA305	-19.5459	6.72e-09	1.86e-08	-	-	-
CP109953_predRNA313	-5.44811	3.25e-225	7.8e-224	sRNAG0791	CsrC	RF00084
CP109953_predRNA314	-19.8738	4.65e-10	1.42e-09	-	-	-
CP109953_predRNA320	16.5632	3.02e-280	8.71e-279	sRNAPU0253	-	-
CP109953_predRNA329	-22.0742	7.38e-49	7.59e-48	sRNAG0793	GlmY_tke1	RF00128
CP109953_predRNA339	17.0753	2.53e-301	9.12e-300	sRNAPU0253	-	-
CP109953_predRNA343	-20.3599	2.67e-12	1.03e-11	-	-	-
CP109953_predRNA346	-2.21292	3.34e-10	1.05e-09	-	-	-
CP109953_predRNA353	-19.3823	7.08e-08	1.79e-07	-	-	-
CP109953_predRNA362	-20.3698	9.5e-15	4.56e-14	-	-	-
CP109953_predRNA364	-19.1736	2.91e-06	6.16e-06	-	-	-
CP109953_predRNA371	-18.2844	0.00071421	0.000952902	-	-	-
CP109953_predRNA372	-19.3033	1.16e-07	2.83e-07	sRNAG0718	GadY	RF00122
CP109953_predRNA374	-2.84814	5.85e-17	3.37e-16	-	-	-
CP109953_predRNA376	-18.7062	1.68e-05	3.03e-05	-	-	-
CP109953_predRNA379	-17.3274	0.0141829	0.0155903	-	-	-
CP109953_predRNA38	-20.0315	1.49e-13	6.15e-13	-	-	-
CP109953_predRNA382	-18.2775	0.000410315	0.000585003	-	-	-
CP109953_predRNA383	-18.8063	1.97e-05	3.5e-05	-	-	-
CP109953_predRNA386	-18.4464	0.000133989	0.000209722	-	-	-
CP109953_predRNA391	-18.1797	0.000471849	0.000666139	-	-	-
CP109953_predRNA395	-17.488	0.00609401	0.00680261	-	-	-
CP109953_predRNA396	-2.95181	2.54e-07	5.99e-07	-	-	-
CP109953_predRNA398	-2.21232	5.45e-14	2.45e-13	-	-	-
CP109953_predRNA399	-19.6734	4.34e-08	1.12e-07	-	-	-
CP109953_predRNA40	-18.9129	3.1e-05	5.26e-05	-	-	-
CP109953_predRNA400	-19.7838	5.27e-10	1.58e-09	-	-	-
CP109953_predRNA41	-18.1173	0.000882855	0.00114532	-	-	-
CP109953_predRNA42	-18.846	2.06e-05	3.62e-05	-	-	-
CP109953_predRNA423	15.6309	1.48516133139879e-320	1.06931615860713e-318	sRNAPU0253	-	-
CP109953_predRNA437	-2.43368	2.64e-06	5.67e-06	-	-	-
CP109953_predRNA44	-17.8846	0.00374808	0.00440234	-	-	-
CP109953_predRNA440	-18.1356	0.000492961	0.000682561	-	-	-
CP109953_predRNA441	-20.146	5.05e-12	1.86e-11	-	-	-
CP109953_predRNA442	-19.0583	8.3e-06	1.59e-05	-	-	-
CP109953_predRNA445	-18.7451	7.61e-06	1.52e-05	-	-	-
CP109953_predRNA45	-18.6736	2.62e-05	4.5e-05	-	-	-
CP109953_predRNA459	-19.2274	1.72e-11	5.74e-11	-	STAXI	RF01728
CP109953_predRNA464	-18.5365	5.25e-05	8.59e-05	-	-	-
CP109953_predRNA466	-18.2691	0.000212491	0.000318737	-	-	-
CP109953_predRNA469	-18.0663	0.00134064	0.00167872	-	-	-
CP109953_predRNA47	-18.9551	4.76e-06	9.8e-06	-	-	-
CP109953_predRNA473	-18.8156	5.9e-06	1.2e-05	sRNAPU0022	-	-
CP109953_predRNA48	-18.7307	9.52e-05	0.0001507	-	-	-
CP109953_predRNA485	-20.233	2.72e-12	1.03e-11	-	-	-
CP109953_predRNA49	-19.229	7.36e-07	1.66e-06	-	-	-
CP109953_predRNA492	-20.0359	7.54e-12	2.65e-11	-	-	-
CP109953_predRNA50	-20.4203	4.48e-15	2.3e-14	-	-	-
CP109953_predRNA55	-19.2971	7.66e-09	2.08e-08	-	-	-
CP109953_predRNA66	-2.41457	0.000169786	0.000257359	-	-	-
CP109953_predRNA67	-19.7354	1.01e-08	2.68e-08	-	-	-
CP109953_predRNA71	-19.2781	2.44e-07	5.86e-07	-	-	-
CP109953_predRNA73	-18.8632	7.95e-06	1.55e-05	-	-	-
CP109953_predRNA76	-19.9693	2.4e-11	7.87e-11	-	-	-
CP109953_predRNA77	-20.1046	9.44e-12	3.24e-11	-	-	-
CP109953_predRNA84	-2.0097	0.000142794	0.000218749	-	-	-
CP109953_predRNA86	-19.1731	4.76e-07	1.09e-06	-	-	-
CP109953_predRNA87	-20.2856	9.4e-15	4.56e-14	-	-	-
CP109953_predRNA88	-20.5956	1.37e-15	7.28e-15	-	-	-
CP109953_predRNA9	-18.0431	0.00125561	0.00161103	-	-	-
CP109953_predRNA91	-18.0924	0.00182155	0.00220423	-	-	-
CP109953_predRNA92	-23.9593	2.4e-143	4.93e-142	-	-	-
CP109955_predRNA1	-18.6835	4.2e-05	6.94e-05	-	-	-
CP109955_predRNA16	-19.0806	7.82e-06	1.54e-05	-	-	-
CP109955_predRNA4	-17.9892	0.00129984	0.0016419	-	-	-
CP109955_predRNA9	-18.3334	0.000395518	0.000575299	-	-	-
CP109956_predRNA3	-18.6192	7.33e-05	0.000118577	-	-	-
CP109956_predRNA6	-20.8255	1.43e-18	8.97e-18	-	-	-
CP109956_predRNA8	-17.9211	0.0014259	0.00176485	-	-	-
